# Supplementary material for: Oxygen limited thermal tolerance is seen in a plastron breathing insect, and can be induced in a bimodal gas exchanger
Source: Oxford University Press journal article supplement (doi:10.1242/jeb.119560), 2015-01-01
Supplement: jeb119560supp.pdf [file jeb119560supp.pdf]

**Table S1. ANOVA table for linear regression on CTmax data for all individuals**

Response: data\$CTmax1

|                     | Df  | Sum Sq  | Mean Sq | F value  | Pr(>F)    |     |
|---------------------|-----|---------|---------|----------|-----------|-----|
| O2                  | 1   | 286.55  | 286.55  | 69.5651  | 1.01e-13  | *** |
| Species             | 1   | 1115.40 | 1115.40 | 270.7805 | < 2.2e-16 | *** |
| Expsetup            | 1   | 15.03   | 15.03   | 3.6481   | 0.05837   | .   |
| log10(DW)           | 1   | 0.28    | 0.28    | 0.0674   | 0.79560   |     |
| Stage               | 1   | 7.98    | 7.98    | 1.9382   | 0.16628   |     |
| O2:Species          | 1   | 71.06   | 71.06   | 17.2517  | 5.94e-05  | *** |
| O2:Expsetup         | 1   | 24.09   | 24.09   | 5.8477   | 0.01700   | *   |
| Species:Expsetup    | 1   | 15.20   | 15.20   | 3.6908   | 0.05694   | .   |
| O2:Species:Expsetup | 1   | 19.02   | 19.02   | 4.6165   | 0.03355   | *   |
| Residuals           | 128 | 527.26  | 4.12    |          |           |     |

**Table S2. Summary of linear regression on CTmax data for *Ilyocoris* adults**

```
lm(formula = CTmax1 ~ oxygen + Expsetup + log10(DW) + Expsetup:oxygen,
    data = subset(ilyo, ilyo$Stage != "juv"))
```

Residuals:

| Min     | 1Q      | Median | 3Q     | Max    |
|---------|---------|--------|--------|--------|
| -5.0109 | -0.4133 | 0.1690 | 0.5986 | 2.5541 |

Coefficients:

|                          | Estimate | Std. Error | t value | Pr(> t ) |     |
|--------------------------|----------|------------|---------|----------|-----|
| (Intercept)              | 47.23300 | 5.57956    | 8.465   | 6.15e-11 | *** |
| oxygen0.05               | -1.06163 | 0.54952    | -1.932  | 0.059541 | .   |
| oxygen0.6                | -0.23786 | 0.55757    | -0.427  | 0.671654 |     |
| Expsetupnoair            | 0.05135  | 0.70832    | 0.072   | 0.942520 |     |
| log10(DW)                | -2.32237 | 2.22779    | -1.042  | 0.302648 |     |
| oxygen0.05:Expsetupnoair | -3.59189 | 0.93629    | -3.836  | 0.000379 | *** |
| oxygen0.6:Expsetupnoair  | 0.78553  | 1.06128    | 0.740   | 0.462956 |     |

---  
 signif. codes: 0 '\*\*\*' 0.001 '\*\*' 0.01 '\*' 0.05 '.' 0.1 ' ' 1

**Table S3. Summary of linear regression on CTmax data for *Aphelocheirus* adults**

```
lm(formula = CTmax1 ~ O2 + Expsetup + log10(DW) + Stage + O2:Expsetup +
  Expsetup:O2, data = aphe)
```

Residuals:

| Min     | 1Q      | Median | 3Q     | Max    |
|---------|---------|--------|--------|--------|
| -4.9723 | -0.6602 | 0.0136 | 0.7151 | 4.4284 |

Coefficients:

|                     | Estimate | Std. Error | t value | Pr(> t ) |     |
|---------------------|----------|------------|---------|----------|-----|
| (Intercept)         | 29.1112  | 4.2081     | 6.918   | 2.42e-09 | *** |
| O20.2               | 4.9774   | 0.9341     | 5.328   | 1.33e-06 | *** |
| O20.6               | 6.4267   | 0.9416     | 6.825   | 3.53e-09 | *** |
| Expsetupnoair       | -0.4826  | 0.7525     | -0.641  | 0.524    |     |
| log10(DW)           | 0.9482   | 1.8867     | 0.503   | 0.617    |     |
| Stagejuv            | 0.3786   | 0.9576     | 0.395   | 0.694    |     |
| O20.2:Expsetupnoair | 1.0179   | 1.0413     | 0.977   | 0.332    |     |
| O20.6:Expsetupnoair | 0.3254   | 1.0648     | 0.306   | 0.761    |     |

---  
Signif.

**Table S4. ANOVA table of linear regression on CTmax data for adults and juveniles of both the permanently submerged plastron breather *Aphelocheirus* (assessed without access to air) and the bimodal breather *Ilyocoris* (assessed with access to air)**

Response: CTmax1

|                | Df  | Sum Sq | Mean Sq | F value  | Pr(>F)    |     |
|----------------|-----|--------|---------|----------|-----------|-----|
| oxygen         | 2   | 340.14 | 170.07  | 95.4400  | < 2.2e-16 | *** |
| Species        | 1   | 978.04 | 978.04  | 548.8599 | < 2.2e-16 | *** |
| Stage          | 1   | 2.53   | 2.53    | 1.4186   | 0.2365    |     |
| oxygen:species | 2   | 160.85 | 80.42   | 45.1327  | 1.077e-14 | *** |
| Residuals      | 100 | 178.20 | 1.78    |          |           |     |

---  
Signif. codes: 0 '\*\*\*' 0.001 '\*\*' 0.01 '\*' 0.05 '.' 0.1 ' ' 1
